# Supplementary material for: Healthy diets can create environmental trade-offs, depending on how diet quality is measured
Source: Nutr J. 2020 Oct 27;19:117. doi: 10.1186/s12937-020-00629-6 (PMC7592508; doi:10.1186/s12937-020-00629-6)
Supplement: Supplementary file 3 — Additional file 3: Supplemental Table 1. Scoring standards for each component of the Healthy Eating Index-2015 (HEI-2015) and Alternative Healthy Eating Index-2010 (AHEI-2010) EPA, eicosapentaenoic acid (20:5, n-3). DHA, docosahexaenoic acid (22:6, n-3). 1Development and validation available at https://epi.grants.cancer.gov/hei/developing.html#20052Energy-adjusted to 1000 kcal, except for unsaturated fatty acids, saturated fatty acids, and added sugars. 3Cup equivalents and ounce equivalents were obtained from the USDA Food Pattern Equivalents Database (https://www.ars.usda.gov/northeast-area/beltsville-md-bhnrc/beltsville-human-nutrition-research-center/food-surveys-research-group/docs/fped-overview/). 4Development, validation, scoring standards, cup equivalents, and ounce equivalents from Chiuve et al. (2012). Alternative dietary indices both strongly predict risk of chronic disease. Journal of Nutrition, 142:1009–1018. To adapt the scoring standards for children, modifications were made to the scores for sodium and alcohol (see relevant footnotes for details), and the scores for the other components were energy-adjusted to 1849 kcal, which reflects the mean energy intake of the source population from which this index was constructed (from Chiuve et al., 2012). 5To adapt the scoring standards for children, scores were energy-adjusted to 1849 kcal, which reflects the mean energy intake of the source population from Chiuvre et al. (2012). Alternative dietary indices both strongly predict risk of chronic disease. Journal of Nutrition, 142:1009–1018. 6Beverages with ≥15 g of added sugar per 8 oz serving. 7Age categories (years): 1–3, 4–8, 9–13, 14–18, 19–30, 31–50, 51–70, ≥70. 8Adult non-drinkers received 2.5 points. Children (< 18 years) non-drinkers received 10 points and drinkers received 0 points. [file 12937_2020_629_MOESM3_ESM.xlsx]

## Sheet: Supp. Table 1
Supplemental Table 1: Scoring standards for each component of the Healthy Eating Index-2015 (HEI-2015) and Alternate Healthy Eating Index-2010 (AHEI-2010)
			HEI-20151,2,3 100 points total (12 components: 5-10 points each)				AHEI-20104,5 100 points total (10 components: 10 points each)
Component			Minimum score		Maximum score		Minimum score		Maximum score
Fruit, total			No fruit (0 points)		≥0.8 cup equivalents (5 points)
	Whole fruit		No whole fruit (0 points)		≥0.4 cup equivalents (5 points)		No whole fruit (0 points)		≥2 cup equivalents (10 points)
					equivalents (5 points)
Vegetables, total			No vegetables (0 points)		≥1.1 cup equivalents (5 points)		No vegetables, excluding potatoes (0 points)		≥2.5 cup equivalents, excluding potatoes (10 points)
	Greens and beans		No greens and beans (0 points)		≥0.2 cup equivalents (5 points)
Whole grains			No whole grains (0 points)		≥1.5 ounce equivalents (10 points)				Women: 5 ounce equivalents; men: 6 ounce equivalents (10 points)
Refined grains			≥4.3 ounce equivalents (0 points)		≤1.8 ounce equivalents (10 points)
Dairy			No dairy (0 points)		≥1.3 cup equivalents (10 points)
Protein foods, total			No protein foods (0 points)		≥2.5 ounce equivalents (5 points)
Red and processed meat							≥1.5 ounce equivalents of processed meat, or ≥4 ounce equivalents of unprocessed red meat (0 points)		No red and processed meat (10 points)
Seafood and plant proteins			No seafood or plant proteins (0 points)		≥0.8 ounce equivalents (5 points)
Nuts and plant proteins							No nuts and plant proteins (0 points)		≥1 ounce equivalents (10 points)
Unsaturated fatty acids			(PUFA + MUFA)/SFA≤1.2 (0 points)		(PUFA + MUFA)/SFA≥2.5 (10 points)		No EPA or DHA (0 points); PUFA≤2% of energy (0 points)		EPA+DHA≥250 mg (10 points); PUFA≥10% of energy (10 points)
Saturated fatty acids			≥16% of energy (0 points)		≤8% of energy (10 points)
Added sugars			≥26% of energy (0 points)		≤6.5 grams (10 points)
Sugar-sweetened beverages6							≥28.35 grams, including fruit juice (0 points)		No sugar sweetened beverages, including fruit juice (10 points)
Sodium			≥2.0 grams (0 points)		≤1.1 grams (10 points)		Lowest decile (mg) within each age category7 (0 points)		Highest decile (mg) within each age category7 (10 points)
Alcohol							Women: ≥2.5 drinks; men: ≥3.5 drinks (0 points)8		Women: 0.5-1.5 drinks; men: 0.5-2 drinks (10 points)8
EPA, eicosapentaenoic acid (20:5, n-3).
DHA, docosahexaenoic acid (22:6, n-3).
1Development and validation available at https://epi.grants.cancer.gov/hei/developing.html#2005
2Energy-adjusted to 1,000 kcal, except for unsaturated fatty acids, saturated fatty acids, and added sugars.
3Cup equivalents and ounce equivalents were obtained from the USDA Food Pattern Equivalents Database (https://www.ars.usda.gov/northeast-area/beltsville-md-bhnrc/beltsville-human-nutrition-research-center/food-surveys-research-group/docs/fped-overview/).
4Development, validation, scoring standards, cup equivalents, and ounce equivalents from Chiuve et al. (2012). Alternative dietary indices both strongly predict risk of chronic disease. Journal of Nutrition, 142:1009-1018. To adapt the scoring standards for children, modifications were made to the scores for sodium and alcohol (see relevant footnotes for details), and the scores for the other com…
5To adapt the scoring standards for children, scores were energy-adjusted to 1,849 kcal, which reflects the mean energy intake of the source population from Chiuvre et al. (2012). Alternative dietary indices both strongly predict risk of chronic disease. Journal of Nutrition, 142:1009-1018.
6Beverages with ≥15 grams of added sugar per 8 ounce serving.
7Age categories (years): 1-3, 4-8, 9-13, 14-18, 19-30, 31-50, 51-70, ≥70.
8Adult non-drinkers received 2.5 points. Children (<18 years) non-drinkers received 10 points and drinkers received 0 points.
