# Supplementary material for: Healthy diets can create environmental trade-offs, depending on how diet quality is measured
Source: Nutr J. 2020 Oct 27;19:117. doi: 10.1186/s12937-020-00629-6 (PMC7592508; doi:10.1186/s12937-020-00629-6)
Supplement: Supplementary file 5 — Additional file 5: Supplemental Table 3. Healthy Eating Index-2015 component scores, National Health and Nutrition Examination Survey, 2005–2016 (n = 50,014) Includes individuals ≥2 years of age. [file 12937_2020_629_MOESM5_ESM.xlsx]

## Sheet: Supp. Table 3
Supplemental Table 3: Healthy Eating Index-2015 component scores, National Health and Nutrition Examination Survey, 2005-2016 (n=50,014)
Component		Max. score		Overall (n=50,014)			Quintile 1 (n=10,002)			Quintile 2 (n=10,003)			Quintile 3 (n=10,003)			Quintile 4 (n=10,003)			Quintile 5 (n=10,003)
				Mean (95% CI)
Total HEI		100		58.3806	(57.7-59)		31.5032	(31.3-31.8)		44.3773	(44.1-44.6)		55.3868	(55-55.7)		66.2932	(66-66.6)		81.5871	(81.1-82.1)
Total fruit		5		2.96377	(2.9-3)		0.723193	(0.7-0.8)		1.64235	(1.6-1.7)		2.62496	(2.5-2.7)		3.87	(3.7-4)		5	(5-5)
Whole fruit		5		3.99317	(3.9-4.1)		0.717734	(0.7-0.8)		1.91839	(1.8-2.1)		3.27716	(3.1-3.5)		4.97448	(4.8-5)		5	(5-5)
Vegetables		5		3.29089	(3.2-3.4)		2.09398	(2-2.2)		2.72929	(2.7-2.8)		3.2311	(3.1-3.3)		3.69324	(3.6-3.8)		4.68715	(4.6-4.8)
Greens and beans		5		2.77121	(2.6-2.9)		0.519714	(0.5-0.6)		1.27834	(1.2-1.4)		2.23297	(2.1-2.4)		3.43862	(3.2-3.6)		5	(5-5)
Whole grains		10		2.56443	(2.5-2.7)		0.684496	(0.6-0.7)		1.28498	(1.2-1.4)		2.11414	(2-2.2)		3.01788	(2.9-3.1)		5.6615	(5.5-5.9)
Refined grains		10		6.4107	(6.3-6.5)		6.77038	(6.6-6.9)		6.33564	(6.2-6.5)		6.23179	(6.1-6.4)		6.2077	(6-6.4)		6.5067	(6.3-6.7)
Dairy		10		5	(5-5)		4.6128	(4.5-4.7)		5	(5-5)		5	(5-5)		5	(5-5)		5	(5-5)
Total protein foods		5		4.96357	(4.8-5)		1.11054	(1-1.2)		2.46442	(2.3-2.6)		4.15173	(3.9-4.4)		5	(5-5)		5	(5-5)
Seafood and plant proteins		5		4.16112	(4.1-4.3)		1.53139	(1.4-1.6)		3.06825	(2.9-3.2)		4.2685	(4.1-4.4)		5.32083	(5.1-5.5)		8.00481	(7.7-8.3)
Unsaturated fatty acids		10		6.16676	(6.1-6.3)		2.75973	(2.6-2.9)		5.08973	(4.9-5.3)		6.24555	(6-6.4)		7.37798	(7.2-7.6)		9.30532	(9.2-9.4)
Saturated fatty acids		10		4.07719	(4-4.2)		2.75729	(2.6-2.9)		3.84522	(3.7-4)		4.0619	(3.9-4.3)		4.43084	(4.2-4.6)		5.2576	(5.1-5.4)
Added sugar		10		6.26162	(6.1-6.4)		4.24207	(4.1-4.4)		5.1126	(4.9-5.3)		6.19223	(6-6.4)		7.10729	(7-7.3)		8.62828	(8.5-8.7)
Sodium		10		5.75615	(5.7-5.9)		2.97983	(2.8-3.1)		4.60806	(4.4-4.8)		5.75477	(5.6-5.9)		6.85429	(6.7-7)		8.53574	(8.4-8.7)
Includes individuals ≥2 years of age.
