# Supplementary material for: Healthy diets can create environmental trade-offs, depending on how diet quality is measured
Source: Nutr J. 2020 Oct 27;19:117. doi: 10.1186/s12937-020-00629-6 (PMC7592508; doi:10.1186/s12937-020-00629-6)
Supplement: Supplementary file 6 — Additional file 6: Supplemental Table 4. Alternative Healthy Eating Index-2010 component scores, National Health and Nutrition Examination Survey, 2005–2016 (n = 50,014) EPA, eicosapentaenoic acid (20:5, n-3). DHA, docosahexaenoic acid (22:6, n-3). Includes individuals ≥2 years of age. [file 12937_2020_629_MOESM6_ESM.xlsx]

## Sheet: Supp. Table 4
Supplemental Table 4: Alternative Healthy Eating Index-2010 component scores, National Health and Nutrition Examination Survey, 2005-2016 (n=50,014)
Component		Max. score		Overall (n=50,014)			Quintile 1 (n=10,002)			Quintile 2 (n=10,003)			Quintile 3 (n=10,003)			Quintile 4 (n=10,003)			Quintile 5 (n=10,003)
				Mean (95% CI)
Total AHEI		100		41.8048	(41.4-42.2)		22.918	(22.8-23.1)		33.7221	(33.6-33.8)		41.0653	(41-41.1)		48.9266	(48.8-49)		62.0257	(61.8-62.2)
Vegetables		10		4.25715	(4.2-4.3)		3.34537	(3.2-3.5)		3.34537	(3.2-3.5)		3.9692	(3.8-4.1)		4.96217	(48.8-5.1)		6.67543	(6.5-6.8)
Fruit		10		4.44813	(4.3-4.6)		1.06981	(1-1.2)		2.90259	(2.8-3)		4.37957	(4.2-4.5)		5.94643	(6.5-6.1)		7.89593	(7.7-8)
Whole grains		10		1.40529	(1.4-1.4)		0.572835	(0.5-0.6)		0.925647	(0.9-1)		1.22404	(1.2-1.3)		1.68809	(7.7-1.8)		2.57165	(2.5-2.7)
Sugar-sweetened beverages		10		4.29012	(4.2-4.4)		1.20323	(1.1-1.3)		2.77055	(2.6-2.9)		4.11106	(3.9-4.3)		5.6117	(2.5-5.8)		7.68675	(7.6-7.8)
Nuts and plant proteins		10		3.58641	(3.5-3.7)		1.23374	(1.1-1.3)		2.37336	(2.2-2.5)		3.26321	(3.1-3.4)		4.45352	(7.6-4.6)		6.52046	(6.4-6.6)
Red and processed meat		10		5.47397	(5.4-5.6)		2.90434	(2.8-3)		4.48988	(4.4-4.6)		5.58036	(5.4-5.7)		6.4206	(6.4-6.6)		7.95335	(7.8-8.1)
EPA and DHA		10		1.98954	(1.9-2)		1.00795	(1-1.1)		1.43501	(1.4-1.5)		1.79534	(1.7-1.9)		2.24285	(7.8-2.3)		3.40994	(3.3-3.6)
Polyunsaturated fatty acids		10		6.24413	(6.2-6.3)		4.84463	(4.8-4.9)		5.76609	(5.7-5.9)		6.35401	(6.3-6.4)		6.71059	(3.3-6.8)		7.53919	(7.5-7.6)
Sodium		10		5.31674	(5.3-5.4)		4.31816	(4.2-4.4)		4.9708	(4.9-5)		5.27435	(5.2-5.4)		5.63261	(7.5-5.7)		6.36905	(6.3-6.5)
Alcohol		10		4.79328	(4.7-4.9)		3.49892	(3.4-3.6)		4.74277	(4.6-4.8)		5.11418	(5-5.2)		5.25806	(6.3-5.4)		5.40394	(5.3-5.5)
EPA, eicosapentaenoic acid (20:5, n-3).
DHA, docosahexaenoic acid (22:6, n-3).
Includes individuals ≥2 years of age.
