# Supplementary material for: Healthy diets can create environmental trade-offs, depending on how diet quality is measured
Source: Nutr J. 2020 Oct 27;19:117. doi: 10.1186/s12937-020-00629-6 (PMC7592508; doi:10.1186/s12937-020-00629-6)
Supplement: Supplementary file 7 — Additional file 7: Supplemental Table 5. Daily per capita Total Food Demand (2005–2016), by Healthy Eating Index-2015 quintile (n = 50,014) Higher quintiles represent higher diet quality. 1Test for linear trend across quintiles 1 through 5, not adjusted for covariates. 2Test for linear trend across quintiles 1 through 5, adjusted for age (continuous) and sex (male/female). 3Includes vegetable juice. 4Mostly candy, soft drinks, and other beverages. [file 12937_2020_629_MOESM7_ESM.xlsx]

## Sheet: Supp. Table 5
Supplemental Table 5: Daily per capita Total Food Demand (2005-2016), by Healthy Eating Index-2015 quintile (n=50,014)
Food or dish item				Overall (n=50,014)			HEI-2015 quintile 1 (n=10,002)			HEI-2015 quintile 5 (n=10,003)			P-trend1		P-trend-adj.2
				Mean (95% CI), grams
Total				1685.51	(1659-1712)		1228.4	(1197-1260)		2085.82	(2031-2141)		2.91505e-44		1.48736e-46
Meat and mixed meat dishes				235.859	(231-241)		218.842	(208-229)		213.372	(204-223)		0.366392		0.306183
	Beef			57.4639	(55-60)		52.3067	(48-57)		43.2109	(38-48)		0.000456392		8.62746e-05
	Pork			17.7101	(16-19)		16.8577	(14-20)		14.498	(12-17)		0.123662		0.0547894
	Poultry			66.7921	(64-70)		49.7876	(41-59)		73.5375	(69-79)		9.65688e-07		3.5902e-07
	Seafood			28.0755	(26-30)		8.59307	(6-11)		47.7562	(43-52)		8.66052e-30		1.3602e-27
	Meat sandwiches, burgers, sausages, and hotdogs			59.8982	(58-62)		86.7053	(81-92)		28.6892	(26-31)		2.52598e-41		2.65558e-39
	Bacon			2.54437	(2-3)		3.00159	(3-3)		1.43812	(1-2)		2.80471e-07		4.03874e-08
	Other			3.37478	(3-4)		1.59031	(1-2)		4.24182	(2-6)		0.00568571		0.0178315
Eggs and mixed egg dishes				15.2267	(14-16)		15.474	(14-17)		11.7723	(10-13)		0.000109016		2.41907e-05
Dairy				327.466	(319-336)		267	(253-281)		372.644	(357-388)		2.33763e-20		6.67533e-28
	Milk and cream			306.93	(299-315)		244.129	(231-258)		354.677	(340-370)		2.33763e-20		6.67533e-28
	Cheese			20.5359	(20-21)		22.8707	(21-25)		17.9676	(16-20)		3.46416e-05		4.62075e-06
Soup				43.715	(40-48)		33.6171	(28-39)		57.6752	(48-67)		8.74477e-06		3.15476e-26
Grains and mixed grain dishes				189.362	(181-198)		223.056	(215-231)		157.014	(140-174)		2.9664e-12		8.4401e-13
	Bread			57.6477	(56-59)		62.8219	(60-65)		50.3071	(48-53)		2.00371e-13		6.23824e-15
	Breakfast cereal			17.6374	(17-18)		11.0352	(10-12)		26.7037	(25-28)		4.12125e-32		6.43471e-34
	Pancakes, waffles, and French toast			4.58976	(4-5)		6.95723	(6-8)		2.24011	(2-3)		1.53751e-19		2.64002e-15
	Pastas and grain mixtures			26.2769	(25-27)		27.0996	(25-29)		25.5891	(24-27)		0.21		0.512002
	Pizza and calzones			23.4422	(22-25)		57.3551	(53-61)		5.37018	(4-6)		6.80248e-45		2.79689e-43
	Grain-based desserts			59.7682	(52-68)		57.7874	(51-65)		46.8033	(31-63)		0.0308969		0.00459529
Nuts and seeds				15.2283	(12-19)		1.33298	(1-2)		38.5936	(24-53)		3.07296e-07		1.76089e-07
Fruits and vegetables and mixed dishes				619.92	(598-641)		236.383	(216-257)		1037.97	(990-1086)		7.29791e-53		7.21119e-53
	Fruit and mixed fruit dishes			328.254	(315-341)		75.586	(67-84)		625.879	(595-657)		2.86681e-57		2.34905e-57
		Whole fruit		214.368	(204-225)		40.6818	(33-48)		440.948	(411-471)		2.44852e-47		8.0573e-47
		Fruit juice3		113.886	(108-119)		34.9042	(31-38)		184.931	(172-198)		8.54017e-41		5.05062e-43
	Vegetables and mixed vegetable dishes			296.833	(279-315)		161.69	(145-178)		422.483	(384-461)		2.13069e-23		1.07676e-21
		Dark green		22.0027	(20-24)		5.02684	(4-6)		43.5692	(39-48)		5.23729e-33		2.2397e-32
		Yellow and orange		21.7422	(15-28)		9.29727	(4-15)		49.7391	(21-78)		0.00317389		0.00347997
		Tomatoes		33.2091	(31-35)		23.3658	(21-26)		44.4327	(41-48)		5.12911e-15		2.18036e-13
		Legumes		5.1672	(5-6)		0.892924	(1-1)		10.3967	(9-11)		5.52028e-36		1.14851e-36
		Other		214.712	(199-231)		123.107	(107-140)		274.346	(249-299)		3.56464e-19		9.51651e-17
Potatoes and mixed potato dishes				51.0522	(49-53)		39.1447	(36-42)		41.9592	(39-45)		0.395392		0.591391
Table oils and salad dressing				13.3517	(13-14)		9.27833	(9-10)		15.009	(14-16)		3.62529e-15		9.57656e-10
Salty snacks				49.8961	(47-53)		34.2197	(30-38)		55.3128	(48-63)		9.36234e-06		1.62982e-07
Mexican dishes				28.3417	(26-31)		35.6946	(31-40)		18.1928	(15-21)		6.36913e-14		7.03762e-11
Other foods and dishes4				90.9286	(89-93)		113.468	(110-117)		55.9106	(53-59)		2.52484e-47		5.79638e-44
Higher quintiles represent higher diet quality.
1Test for linear trend across quintiles 1 through 5, not adjusted for covariates.
2Test for linear trend across quintiles 1 through 5, adjusted for age (continuous) and sex (male/female).
3Includes vegetable juice.
4Mostly candy, soft drinks, and other beverages.
