# Supplementary material for: Healthy diets can create environmental trade-offs, depending on how diet quality is measured
Source: Nutr J. 2020 Oct 27;19:117. doi: 10.1186/s12937-020-00629-6 (PMC7592508; doi:10.1186/s12937-020-00629-6)
Supplement: Supplementary file 8 — Additional file 8: Supplemental Table 6. Daily per capita Total Food Demand (2005–2016), by Alternative Healthy Eating Index-2010 quintile (n = 50,014) Higher quintiles represent higher diet quality. 1Test for linear trend across quintiles 1 through 5, not adjusted for covariates. 2Test for linear trend across quintiles 1 through 5, adjusted for age (continuous) and sex (male/female). 3Includes vegetable juice. 4Mostly candy, soft drinks, and other beverages. [file 12937_2020_629_MOESM8_ESM.xlsx]

## Sheet: Supp. Table 6
Supplemental Table 6: Daily per capita Total Food Demand (2005-2016), by Alternative Healthy Eating Index-2010 quintile (n=50,014)
Food or dish item				Overall (n=50,014)			AHEI-2010 quintile 1 (n=10,002)			AHEI-2010 quintile 5 (n=10,003)			P-trend1		P-trend-adj.2
				Mean (95% CI), grams
Total				1685.51	(1659-1712)		1570.78	(1528-1614)		1852.45	(1797-1908)		1.95542e-14		1.15889e-18
Meat and mixed meat dishes				235.859	(231-241)		307.494	(297-318)		186.985	(177-197)		5.62685e-32		1.00704e-29
	Beef			57.4639	(55-60)		98.2133	(92-105)		23.9624	(21-27)		3.01548e-37		6.78204e-37
	Pork			17.7101	(16-19)		30.729	(27-34)		7.73826	(6-9)		2.67628e-18		2.07689e-18
	Poultry			66.7921	(64-70)		49.2601	(44-55)		78.0899	(72-85)		3.90997e-10		1.65358e-12
	Seafood			28.0755	(26-30)		7.38174	(6-9)		53.9608	(49-59)		1.03383e-34		3.07025e-34
	Meat sandwiches, burgers, sausages, and hotdogs			59.8982	(58-62)		113.72	(108-119)		18.9857	(17-21)		5.46093e-56		1.20173e-54
	Bacon			2.54437	(2-3)		3.70822	(3-4)		1.42172	(1-2)		2.57018e-11		3.18932e-10
	Other			3.37478	(3-4)		4.48237	(3-6)		2.82588	(1-4)		0.0641143		0.118906
Eggs and mixed egg dishes				15.2267	(14-16)		18.3093	(17-20)		12.4452	(11-14)		1.01242e-06		3.859e-06
Dairy				327.466	(319-336)		315.391	(297-334)		313.159	(298-328)		0.681949		0.000388287
	Milk and cream			306.93	(299-315)		291.534	(274-310)		294.156	(280-308)		0.681949		0.000388287
	Cheese			20.5359	(20-21)		23.8569	(22-26)		19.0031	(17-21)		0.000261622		0.000200656
Soup				43.715	(40-48)		31.6232	(25-38)		57.1378	(49-66)		1.14068e-06		0.00204858
Grains and mixed grain dishes				189.362	(181-198)		207.09	(197-217)		166.146	(144-188)		0.00032579		0.00834133
	Bread			57.6477	(56-59)		64.162	(61-67)		51.6549	(48-55)		5.29149e-07		1.38276e-05
	Breakfast cereal			17.6374	(17-18)		14.2585	(13-16)		20.9618	(19-22)		1.30861e-08		1.4609e-11
	Pancakes, waffles, and French toast			4.58976	(4-5)		5.62846	(5-6)		2.85106	(2-3)		7.01974e-10		6.42625e-06
	Pastas and grain mixtures			26.2769	(25-27)		25.9604	(24-28)		25.2453	(23-27)		0.784094		0.400324
	Pizza and calzones			23.4422	(22-25)		41.7359	(38-45)		9.39537	(8-11)		1.847e-35		7.7247e-31
	Grain-based desserts			59.7682	(52-68)		55.3443	(46-64)		56.038	(36-76)		0.899858		0.983979
Nuts and seeds				15.2283	(12-19)		2.412	(1-4)		41.0675	(26-56)		4.65163e-07		5.91201e-08
Fruits and vegetables and mixed dishes				619.92	(598-641)		362.218	(336-389)		902.717	(860-946)		1.13527e-42		6.75577e-42
	Fruit and mixed fruit dishes			328.254	(315-341)		170.847	(155-186)		493.087	(467-519)		1.64099e-41		2.94641e-41
		Whole fruit		214.368	(204-225)		58.5702	(45-72)		387.449	(364-411)		6.25519e-44		7.26005e-43
		Fruit juice3		113.886	(108-119)		112.276	(104-121)		105.638	(95-117)		0.19232		0.909303
	Vegetables and mixed vegetable dishes			296.833	(279-315)		193.639	(170-217)		417.907	(383-453)		7.27835e-21		3.33721e-19
		Dark green		22.0027	(20-24)		9.32072	(8-11)		39.8042	(35-44)		4.77245e-23		6.30106e-23
		Yellow and orange		21.7422	(15-28)		7.09849	(5-9)		46.8471	(19-74)		0.00229317		0.00383017
		Tomatoes		33.2091	(31-35)		24.8229	(22-28)		45.6212	(42-49)		7.72588e-16		1.07835e-16
		Legumes		5.1672	(5-6)		2.2675	(2-3)		8.27744	(7-9)		8.98385e-22		5.46679e-23
		Other		214.712	(199-231)		150.129	(127-173)		277.357	(256-299)		8.913e-14		1.69073e-12
Potatoes and mixed potato dishes				51.0522	(49-53)		73.2452	(69-77)		30.3595	(28-33)		1.78394e-32		1.45742e-30
Table oils and salad dressing				13.3517	(13-14)		10.4223	(10-11)		16.1147	(15-17)		3.02279e-17		5.91651e-14
Salty snacks				49.8961	(47-53)		39.5286	(34-45)		55.2702	(47-63)		0.00418247		0.000118055
Mexican dishes				28.3417	(26-31)		33.21	(28-38)		21.3641	(18-25)		1.52036e-05		0.00159044
Other foods and dishes4				90.9286	(89-93)		167.572	(161-174)		41.4111	(40-43)		3.73206e-60		1.06085e-58
Higher quintiles represent higher diet quality.
1Test for linear trend across quintiles 1 through 5, not adjusted for covariates.
2Test for linear trend across quintiles 1 through 5, adjusted for age (continuous) and sex (male/female).
3Includes vegetable juice.
4Mostly candy, soft drinks, and other beverages.
