# Supplementary material for: Healthy diets can create environmental trade-offs, depending on how diet quality is measured
Source: Nutr J. 2020 Oct 27;19:117. doi: 10.1186/s12937-020-00629-6 (PMC7592508; doi:10.1186/s12937-020-00629-6)
Supplement: Supplementary file 11 — Additional file 11: Supplemental Table 9. Annual amount of pesticides used to produce Total Food Demand, by land use category and Healthy Eating Index-2015 quintile Total Food Demand represents the sum of retail waste, consumer waste, inedible portions, and consumed food. Higher quintiles represent higher diet quality. Pesticides include herbicides, insecticides, and fungicides. HEI-2015, Health Eating Index-2015. NA, not applicable. 1Test for linear trend across quintiles 1 through 5. [file 12937_2020_629_MOESM11_ESM.xlsx]

## Sheet: Supp. Table 9
Supplemental Table 9: Annual amount of pesticides used to produce Total Food Demand, by land use category and Healthy Eating Index-2015 quintile
Land use category				Overall			HEI-2015 quintile 1			HEI-2015 quintile 5			P-trend1
				Mean (95% CI), million kg
Total				242.673	(238-247)		31.1915	(30-32)		64.7374	(62-67)		<0.001
Grains				5.22002	(5-5)		1.16733	(1-1)		0.902243	(1-1)		0.00423998
Fruits				108.897	(105-113)		5.42368	(5-6)		40.6155	(39-42)		0.000829811
Vegetables				31.7209	(30-33)		3.94104	(4-4)		7.82924	(7-8)		0.0105086
Legumes				1.13058	(1-1)		0.113772	(0-0)		0.412044	(0-0)		0.0269811
Nuts				4.03087	(4-4)		0.226786	(0-0)		1.74627	(2-2)		0.0169529
Sweeteners				7.71426	(8-8)		2.03866	(2-2)		0.976245	(1-1)		0.000575707
Feed grains and oilseeds				27.9752	(28-28)		5.30448	(5-5)		4.96098	(5-5)		0.588501
Hay				55.9839	(55-57)		12.9757	(12-13)		7.29489	(7-8)		0.0301939
Cropland pasture				0	(0-0)		0	(0-0)		0	(0-0)		NA
Permanent pasture				0	(0-0)		0	(0-0)		0	(0-0)		NA
Total Food Demand represents the sum of retail waste, consumer waste, inedible portions, and consumed food.
Higher quintiles represent higher diet quality.
Pesticides include herbicides, insecticides, and fungicides.
HEI-2015, Health Eating Index-2015.
NA, not applicable
1Test for linear trend across quintiles 1 through 5.
