# Supplementary material for: Healthy diets can create environmental trade-offs, depending on how diet quality is measured
Source: Nutr J. 2020 Oct 27;19:117. doi: 10.1186/s12937-020-00629-6 (PMC7592508; doi:10.1186/s12937-020-00629-6)
Supplement: Supplementary file 13 — Additional file 13: Supplemental Table 11. Annual amount of agricultural land used to produce Total Food Demand, by Alternative Healthy Eating Index-2010 quintile Total Food Demand represents the sum of retail waste, consumer waste, inedible portions, and consumed food. Higher quintiles represent higher diet quality. AHEI-2010, Alternative Healthy Eating Index-2010. 1Test for linear trend across quintiles 1 through 5. [file 12937_2020_629_MOESM13_ESM.xlsx]

## Sheet: Supp. Table 11
Supplemental Table 11: Annual amount of agricultural land used to produce Total Food Demand, by Alternative Healthy Eating Index-2010 quintile
Land use category			Overall			AHEI-2010 quintile 1			AHEI-2010 quintile 5			P-trend1
			Mean (95% CI), million hectares
Total			185.866	(182.1-189.4)		60.5311	(58.7-62.3)		18.7632	(17.3-20.1)		0.0059916
Grains			6.24333	(6.2-6.3)		1.48177	(1.4-1.5)		1.00908	(1-1)		0.000528304
Fruits			2.81982	(2.7-2.9)		0.427921	(0.4-0.5)		0.635612	(0.6-0.7)		0.00852145
Vegetables			2.51221	(2.4-2.6)		0.318772	(0.3-0.3)		0.687456	(0.6-0.7)		<0.001
Legumes			0.23139	(0.2-0.2)		0.028353	(0-0)		0.0720772	(0.1-0.1)		0.0122425
Nuts			0.311746	(0.3-0.3)		0.0177643	(0-0)		0.116789	(0.1-0.1)		0.00225409
Sweeteners			2.09817	(2.1-2.1)		0.644933	(0.6-0.7)		0.248083	(0.2-0.3)		0.00207467
Feed grains and oilseeds			14.6148	(14.4-14.8)		3.62295	(3.5-3.7)		2.30434	(2.2-2.4)		0.00412336
Hay			16.6493	(16.2-17.1)		5.97981	(5.8-6.2)		1.42983	(1.3-1.5)		0.00602278
Cropland pasture			8.06752	(7.5-8.6)		4.79397	(4.5-5.1)		0	(0-0)		0.0603035
Permanent pasture			132.317	(129.6-134.8)		43.2149	(41.9-44.4)		12.2599	(10.9-13.5)		0.00597541
Total Food Demand represents the sum of retail waste, consumer waste, inedible portions, and consumed food.
Higher quintiles represent higher diet quality.
AHEI-2010, Alternate Healthy Eating Index-2010.
1Test for linear trend across quintiles 1 through 5.
