# Supplementary material for: Healthy diets can create environmental trade-offs, depending on how diet quality is measured
Source: Nutr J. 2020 Oct 27;19:117. doi: 10.1186/s12937-020-00629-6 (PMC7592508; doi:10.1186/s12937-020-00629-6)
Supplement: Supplementary file 17 — Additional file 17: Supplemental Table 15. Daily per capita Total Food Demand by time period. HEI-2015, Healthy Eating Index. AHEI-2010, Alternative Healthy Eating Index. Total Food Demand includes retail loss, inedible, consumer waste, and consumption.. 1Z-tests with P < 0.05 tested the difference in diet quality scores within each quintile. [file 12937_2020_629_MOESM17_ESM.xlsx]

## Sheet: Supp. Table 15
Supplemental Table 15: Daily per capita Total Food Demand by time period
									Difference
Diet quality			2005-2016			2005-2010			Mean, grams		Percent1
			Mean (95% CI), grams
Overall			1685.51	(1659-1712)		1866.98	(1830-1904)		181.466		10.7662
HEI-2015 quintile
	1		1228.4	(1197-1260)		1387.01	(1343-1431)		158.602		12.9112
	2		1514.65	(1481-1549)		1671.82	(1620-1723)		157.169		10.3766
	3		1687.69	(1639-1736)		1881.8	(1813-1951)		194.108		11.5014
	4		1848.84	(1806-1891)		2049.93	(1985-2115)		201.093		10.8767
	5		2085.82	(2031-2141)		2334.83	(2261-2408)		249.016		11.9386
AHEI quintile
	1		1570.78	(1528-1614)		1749.92	(1695-1805)		179.136		11.4042
	2		1610.06	(1572-1648)		1789.48	(1731-1848)		179.419		11.1436
	3		1640.17	(1602-1678)		1866.43	(1809-1924)		226.263		13.7951
	4		1734.47	(1689-1780)		1894.86	(1830-1960)		160.392		9.24731
	5		1852.45	(1797-1908)		2041.54	(1966-2117)		189.082		10.2071
HEI-2015, Healthy Eating Index
AHEI-2010, Alternative Healthy Eating Index
Higher quintiles represent higher diet quality.
Total Food Demand includes retail loss, inedible, consumer waste, and consumption.
Mean difference divided by 2005-2016 mean multiplied by 100.
