# Supplementary material for: Healthy diets can create environmental trade-offs, depending on how diet quality is measured
Source: Nutr J. 2020 Oct 27;19:117. doi: 10.1186/s12937-020-00629-6 (PMC7592508; doi:10.1186/s12937-020-00629-6)
Supplement: Supplementary file 18 — Additional file 18: Supplemental Table 16. Unadjusted and adjusted Alternative Healthy Eating Index-2010 scores (2005–2016). Adjusted scores reflect two changes to the Alternative Healthy Eating Index-2010 scoring algorithm to adapt this instrument to a population that includes individuals < 18 years: 1) consumption amounts were energy adjusted to the mean energy intake of the source population (1849 kcal/day), and 2) individuals < 18 years were awarded 10 points for the alcohol component if they reported zero consumption and were awarded zero points if they reported any alcohol consumption.. 1Wald tests with P < 0.05 tested the difference between unadjusted and adjusted scores within each age group. [file 12937_2020_629_MOESM18_ESM.xlsx]

## Sheet: Supp. Table 16
Supplemental Table 16. Unadjusted and adjusted Atlernative Healthy Eating Index-2010 scores (2005-2016)
Sample		n		Original			Modified			Difference		P-difference1
				Mean (95% CI)
2-17 years		17529		43.1	(42.7-43.5)		43.1	(42.7-43.5)		0.003		0.9461
≥18 years		32485		41.6	(41.2-42.0)		41.2	(40.8-41.6)		0.39		<0.001
Adjusted scores reflect two changes to the Alternative Healthy Eating Index-2010 scoring algorithm to adapt this instrument to a population that includes individuals <18 years: 1) consumption amounts were energy adjusted to the mean energy intake of the source population (1,849 kcal/day), and 2) individuals <18 years were awarded 10 points for the alcohol component if they reported zero consumpti…
1Wald tests with P<0.05 tested the difference between unadjusted and adjusted scores within each age group.
